# Supplementary material for: Prognostic Stratification of Multiple Myeloma Using Clinicogenomic Models: Validation and Performance Analysis of the IAC-50 Model
Source: PubMed Central journal article supplement (PMC9348861; doi:10.1097/hs9.0000000000000760), 2022-08-02
Supplement: hs9-6-e760-s001.pdf [file hs9-6-e760-s001.pdf]

| <b>Supplementary Table 1. Genes included in the predictor.</b> |                 |                |               |
|----------------------------------------------------------------|-----------------|----------------|---------------|
| <i>ACTL6B</i>                                                  | <i>FGF1</i>     | <i>MTMR9</i>   | <i>TAF4B</i>  |
| <i>ARHGEF4</i>                                                 | <i>FHOD1</i>    | <i>PES1</i>    | <i>TLL1</i>   |
| <i>CDCA5</i>                                                   | <i>HPGD</i>     | <i>PKMYT1</i>  | <i>UBE2C</i>  |
| <i>CFAP45</i>                                                  | <i>ITGA7</i>    | <i>POLDIP3</i> | <i>UBE2S</i>  |
| <i>CLSTN3</i>                                                  | <i>KIAA0101</i> | <i>PTPRR</i>   | <i>UBE2V2</i> |
| <i>DDX51</i>                                                   | <i>LIMA1</i>    | <i>RBP5</i>    | <i>UNC13C</i> |
| <i>DPF1</i>                                                    | <i>MCM10</i>    | <i>SHROOM3</i> | <i>WEE1</i>   |
| <i>ECHS1</i>                                                   | <i>MCM4</i>     | <i>SLC1A7</i>  | <i>WNT9A</i>  |
| <i>ELOVL6</i>                                                  | <i>MDM2</i>     | <i>SNAP91</i>  | <i>ZC3H18</i> |
| <i>EXO1</i>                                                    | <i>MRPL3</i>    | <i>SRGN</i>    |               |
