# Supplementary material for: Prognostic Stratification of Multiple Myeloma Using Clinicogenomic Models: Validation and Performance Analysis of the IAC-50 Model
Source: PubMed Central journal article supplement (PMC9348861; doi:10.1097/hs9.0000000000000760), 2022-08-02
Supplement: hs9-6-e760-s003.pdf [file hs9-6-e760-s003.pdf]

**Supplementary Table 2.** Cross-validated time-dependent AUCs of the different models for the prediction of OS at 6, 12, 18, 24, 48 and 60 months by age strata.

| >=60 years                            |      |       |
|---------------------------------------|------|-------|
| Model                                 | Time | AUC   |
| <i>IAC-50 GEP</i>                     | 6    | 0,662 |
| <i>IAC-50 GEP</i>                     | 12   | 0,633 |
| <i>IAC-50 GEP</i>                     | 18   | 0,636 |
| <i>IAC-50 GEP</i>                     | 24   | 0,604 |
| <i>IAC-50 GEP</i>                     | 48   | 0,597 |
| <i>IAC-50 GEP</i>                     | 60   | 0,588 |
| <i>UAMS70</i>                         | 6    | 0,62  |
| <i>UAMS70</i>                         | 12   | 0,585 |
| <i>UAMS70</i>                         | 18   | 0,571 |
| <i>UAMS70</i>                         | 24   | 0,573 |
| <i>UAMS70</i>                         | 48   | 0,596 |
| <i>UAMS70</i>                         | 60   | 0,578 |
| <i>IAC-50 GEP + ISS + B2-mg + Age</i> | 6    | 0,816 |
| <i>IAC-50 GEP + ISS + B2-mg + Age</i> | 12   | 0,752 |
| <i>IAC-50 GEP + ISS + B2-mg + Age</i> | 18   | 0,72  |
| <i>IAC-50 GEP + ISS + B2-mg + Age</i> | 24   | 0,706 |
| <i>IAC-50 GEP + ISS + B2-mg + Age</i> | 48   | 0,678 |
| <i>IAC-50 GEP + ISS + B2-mg + Age</i> | 60   | 0,683 |
| <i>UAMS70 + ISS +B2-mg + Age</i>      | 6    | 0,833 |
| <i>UAMS70 + ISS +B2-mg + Age</i>      | 12   | 0,753 |
| <i>UAMS70 + ISS +B2-mg + Age</i>      | 18   | 0,711 |
| <i>UAMS70 + ISS +B2-mg + Age</i>      | 24   | 0,714 |

| < 60 years                            |      |       |
|---------------------------------------|------|-------|
| Model                                 | Time | AUC   |
| <i>IAC-50 GEP</i>                     | 6    | 0,605 |
| <i>IAC-50 GEP</i>                     | 12   | 0,778 |
| <i>IAC-50 GEP</i>                     | 18   | 0,684 |
| <i>IAC-50 GEP</i>                     | 24   | 0,737 |
| <i>IAC-50 GEP</i>                     | 48   | 0,717 |
| <i>IAC-50 GEP</i>                     | 60   | 0,7   |
| <i>UAMS70</i>                         | 6    | 0,43  |
| <i>UAMS70</i>                         | 12   | 0,637 |
| <i>UAMS70</i>                         | 18   | 0,584 |
| <i>UAMS70</i>                         | 24   | 0,658 |
| <i>UAMS70</i>                         | 48   | 0,678 |
| <i>UAMS70</i>                         | 60   | 0,646 |
| <i>IAC-50 GEP + ISS + B2-mg + Age</i> | 6    | 0,761 |
| <i>IAC-50 GEP + ISS + B2-mg + Age</i> | 12   | 0,867 |
| <i>IAC-50 GEP + ISS + B2-mg + Age</i> | 18   | 0,809 |
| <i>IAC-50 GEP + ISS + B2-mg + Age</i> | 24   | 0,829 |
| <i>IAC-50 GEP + ISS + B2-mg + Age</i> | 48   | 0,738 |
| <i>IAC-50 GEP + ISS + B2-mg + Age</i> | 60   | 0,712 |
| <i>UAMS70 + ISS +B2-mg + Age</i>      | 6    | 0,604 |
| <i>UAMS70 + ISS +B2-mg + Age</i>      | 12   | 0,751 |
| <i>UAMS70 + ISS +B2-mg + Age</i>      | 18   | 0,706 |
| <i>UAMS70 + ISS +B2-mg + Age</i>      | 24   | 0,756 |

|                                  |    |       |
|----------------------------------|----|-------|
| <i>UAMS70 + ISS +B2-mg + Age</i> | 48 | 0,696 |
| <i>UAMS70 + ISS +B2-mg + Age</i> | 60 | 0,697 |

|                                  |    |       |
|----------------------------------|----|-------|
| <i>UAMS70 + ISS +B2-mg + Age</i> | 48 | 0,711 |
| <i>UAMS70 + ISS +B2-mg + Age</i> | 60 | 0,68  |
