# Supplementary material for: Prognostic Stratification of Multiple Myeloma Using Clinicogenomic Models: Validation and Performance Analysis of the IAC-50 Model
Source: PubMed Central journal article supplement (PMC9348861; doi:10.1097/hs9.0000000000000760), 2022-08-02
Supplement: hs9-6-e760-s006.pdf [file hs9-6-e760-s006.pdf]

**Supplementary Table 3.** Cross-validated time-dependent AUCs of the different models for the prediction of PFS at 6, 12, 18, 24, 48 and 60 months by age strata.

>= 60 years

| Model                                 | Time | AUC   |
|---------------------------------------|------|-------|
| <i>IAC-50 GEP</i>                     | 6    | 0,626 |
| <i>IAC-50 GEP</i>                     | 12   | 0,56  |
| <i>IAC-50 GEP</i>                     | 18   | 0,567 |
| <i>IAC-50 GEP</i>                     | 24   | 0,603 |
| <i>IAC-50 GEP</i>                     | 48   | 0,6   |
| <i>IAC-50 GEP</i>                     | 60   | 0,622 |
| <i>UAMS70</i>                         | 6    | 0,586 |
| <i>UAMS70</i>                         | 12   | 0,555 |
| <i>UAMS70</i>                         | 18   | 0,582 |
| <i>UAMS70</i>                         | 24   | 0,608 |
| <i>UAMS70</i>                         | 48   | 0,578 |
| <i>UAMS70</i>                         | 60   | 0,559 |
| <i>IAC-50 GEP + ISS + B2-mg + Age</i> | 6    | 0,805 |
| <i>IAC-50 GEP + ISS + B2-mg + Age</i> | 12   | 0,687 |
| <i>IAC-50 GEP + ISS + B2-mg + Age</i> | 18   | 0,689 |
| <i>IAC-50 GEP + ISS + B2-mg + Age</i> | 24   | 0,704 |
| <i>IAC-50 GEP + ISS + B2-mg + Age</i> | 48   | 0,717 |
| <i>IAC-50 GEP + ISS + B2-mg + Age</i> | 60   | 0,722 |
| <i>UAMS70 + ISS +B2-mg + Age</i>      | 6    | 0,82  |
| <i>UAMS70 + ISS +B2-mg + Age</i>      | 12   | 0,708 |
| <i>UAMS70 + ISS +B2-mg + Age</i>      | 18   | 0,726 |
| <i>UAMS70 + ISS +B2-mg + Age</i>      | 24   | 0,738 |

< 60 years

| Model                                 | Time | AUC   |
|---------------------------------------|------|-------|
| <i>IAC-50 GEP</i>                     | 6    | 0,574 |
| <i>IAC-50 GEP</i>                     | 12   | 0,736 |
| <i>IAC-50 GEP</i>                     | 18   | 0,713 |
| <i>IAC-50 GEP</i>                     | 24   | 0,682 |
| <i>IAC-50 GEP</i>                     | 48   | 0,689 |
| <i>IAC-50 GEP</i>                     | 60   | 0,652 |
| <i>UAMS70</i>                         | 6    | 0,499 |
| <i>UAMS70</i>                         | 12   | 0,623 |
| <i>UAMS70</i>                         | 18   | 0,613 |
| <i>UAMS70</i>                         | 24   | 0,598 |
| <i>UAMS70</i>                         | 48   | 0,613 |
| <i>UAMS70</i>                         | 60   | 0,592 |
| <i>IAC-50 GEP + ISS + B2-mg + Age</i> | 6    | 0,626 |
| <i>IAC-50 GEP + ISS + B2-mg + Age</i> | 12   | 0,732 |
| <i>IAC-50 GEP + ISS + B2-mg + Age</i> | 18   | 0,694 |
| <i>IAC-50 GEP + ISS + B2-mg + Age</i> | 24   | 0,677 |
| <i>IAC-50 GEP + ISS + B2-mg + Age</i> | 48   | 0,69  |
| <i>IAC-50 GEP + ISS + B2-mg + Age</i> | 60   | 0,622 |
| <i>UAMS70 + ISS +B2-mg + Age</i>      | 6    | 0,597 |
| <i>UAMS70 + ISS +B2-mg + Age</i>      | 12   | 0,647 |
| <i>UAMS70 + ISS +B2-mg + Age</i>      | 18   | 0,618 |
| <i>UAMS70 + ISS +B2-mg + Age</i>      | 24   | 0,611 |

|                                  |    |       |
|----------------------------------|----|-------|
| <i>UAMS70 + ISS +B2-mg + Age</i> | 48 | 0,739 |
| <i>UAMS70 + ISS +B2-mg + Age</i> | 60 | 0,728 |

|                                  |    |       |
|----------------------------------|----|-------|
| <i>UAMS70 + ISS +B2-mg + Age</i> | 48 | 0,642 |
| <i>UAMS70 + ISS +B2-mg + Age</i> | 60 | 0,575 |
